# Supplementary material for: Towards the Development of a Z-Scheme FeOx/g-C3N4 Thin Film and Perspectives for Ciprofloxacin Visible Light-Driven Photocatalytic Degradation
Source: MDPI journal article supplement (doi:10.3390/app131910591), 2023-09-22
Supplement: s1 [file s1]

Archive with 1 entries (1 files):
- applsci-2554631-supplementary.pdf
